# Supplementary material
Source: PubMed Central journal article supplement (PMC5840004)
Supplement: NIHMS934867-supplement-1.pdf [file NIHMS934867-supplement-1.pdf]

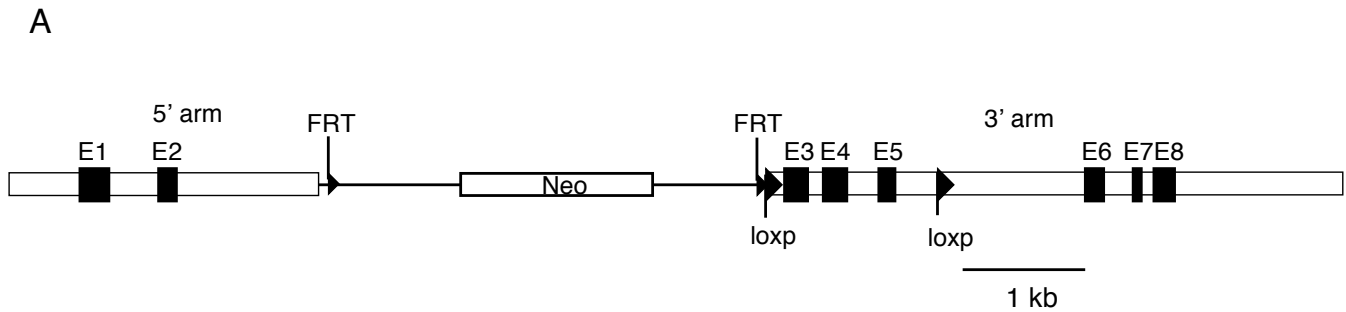

**B**

|       |     |                                                               |     |
|-------|-----|---------------------------------------------------------------|-----|
| WT    | 1   | MTMALRVTTDVLARPWQCLHRTRALGTTATLAPKTLQPFEAIPQYSRNKWLKMIQILRE   | 60  |
| ΔX3-5 | 1   | MTMALRVTTDVLARPWQCLHRTRALGTTATLAPKTLQPFEAIPQYSRNKWLKMIQILRE   | 60  |
|       |     | *****                                                         |     |
| WT    | 61  | QGQENLHLEMHQVFRELGPIFRHSVGTKQIVFVTLPEDVEKLYQVESTHPCRMPLESWIV  | 120 |
| ΔX3-5 | 61  | QGQENLHLEMHQVFRELGPIFRHSVGTKQIVFVTLPEDVEKLYQVESTHPCRMPLESWIV  | 120 |
|       |     | *****                                                         |     |
| WT    | 121 | HRELRLGLGRGVFLLNGPEWYFNRLQLNPNVLSPKAVQKFVPLVDGIARDFVDNLKKKMLE | 180 |
| ΔX3-5 | 121 | HRELRLGLGRGVFLLHQPPW*                                         |     |
|       |     | ***** . * *                                                   |     |

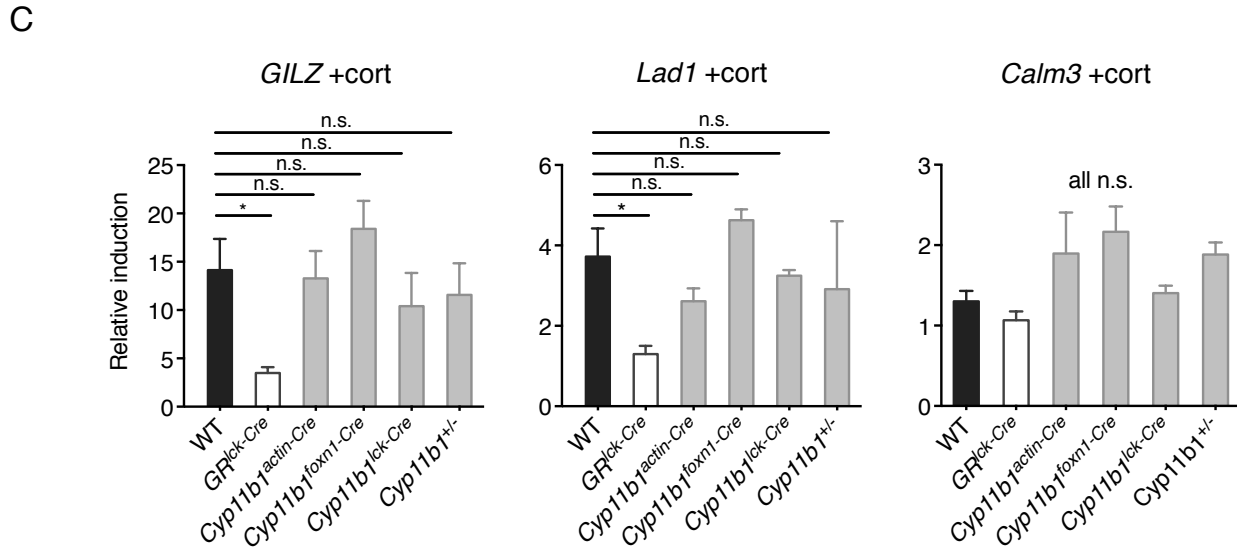

SUPPLEMENTAL FIGURE 1. (A) Location of *loxp* sites flanking *CYP11B1* exons 3-5. (B) Frameshift in *CYP11B1* following deletion of exons 3-5. (C) mRNA levels of GC-sensitive and -insensitive genes in thymocytes following treatment with corticosterone.

SUPPLEMENTAL TABLE 1

Sequences of primers used for genotyping and real-time PCR

|                                    |                                |
|------------------------------------|--------------------------------|
| <i>Cyp11b1</i> 5' loxp-F           | CCAGCAAGGAAAGTGTCGGA           |
| <i>Cyp11b1</i> 5' loxp-R           | GTTGCATCGACCGGTAATGC           |
| <i>Cyp11b1</i> 3' loxp-F           | CCTTGTCCTTGTCTTTCCTTG          |
| <i>Cyp11b1</i> 3' loxp-R           | GAGTGGCCCAGAGTCTTCTC           |
| <i>Cyp11b1</i> exon 3-5 deletion-F | TAGAGAGTACGCACCCTTGC           |
| <i>Cyp11b1</i> exon 3-5 deletion-R | GAAGTACCATTCTGGCCCAT           |
| <i>Cre</i> (generic)-F             | CGATGCAACGAGTGAGG              |
| <i>Cre</i> (generic)-R             | GCATTGCTGTCACCTGGTCGT          |
| <i>Lck-Cre</i> -F                  | CCTTGGTGGAGGAGGGTGGAAATGAA     |
| <i>Lck-Cre</i> -R                  | AATGTTGCTGGATAGTTTTTACTGC      |
| <i>H-2a</i> -F                     | GAAGACGACATTGAGGCCGACCACGTAGGC |
| <i>H-2a</i> -R                     | ATTGGTAGCTGGGGTGGAAATTTGACCTCT |
| <i>Cyp11b1</i> exon 4-F            | GTTCCCTCCACACCCTGCACT          |
| <i>Cyp11b1</i> exon 4-R            | TCTTCCACACCCTGGTGCTT           |
| <i>AND TCR</i> -F                  | GACTTGGAGATTGCCAACCCATATCTAAGT |
| <i>AND TCR</i> -R                  | TGAGCCGAAGGTGTAGTCGGAGTTTGCATT |
| <i>HPRT</i> mRNA-F                 | ATTATGCCGAGGATTTGGAA           |
| <i>HPRT</i> mRNA-R                 | CCCATCTCCTTCATGACATCT          |
| <i>GILZ</i> mRNA-F                 | GGTGGCCCTAGACAACAAGA           |
| <i>GILZ</i> mRNA-R                 | TCTTCTCAAGCAGCTCACGA           |
| <i>Lad1</i> mRNA-F                 | CAACTCAGAAACACCCTTAAC          |
| <i>Lad1</i> mRNA-R                 | TGGTATCTCTCCAGTTTCTC           |
| <i>Calm3</i> mRNA-F                | AACAGATTGCAGAGTTCAAG           |
| <i>Calm3</i> mRNA-R                | CACCTCATTAATCATGTCCTG          |

Primer sequences are shown from 5' to 3'.
